# Supplementary material
Source: PubMed Central journal article supplement (PMC2154451)
Supplement: supp_0706339104_06339Fig9.pdf [file supp_0706339104_06339Fig9.pdf]

(i) Vertebrate

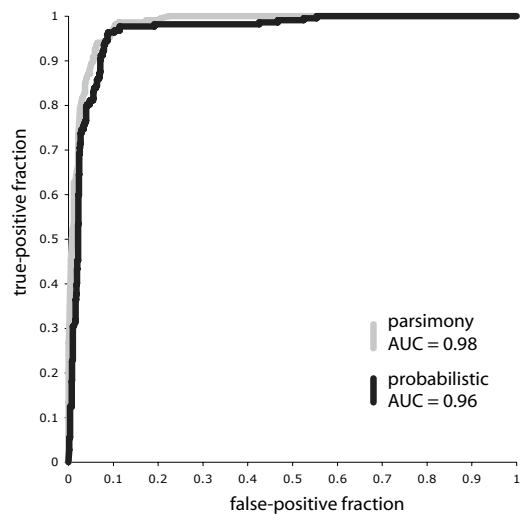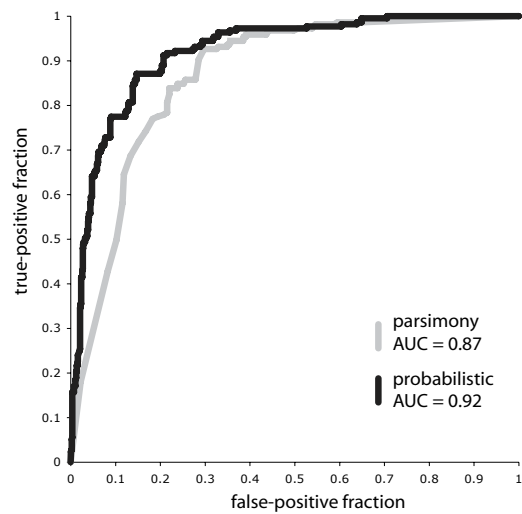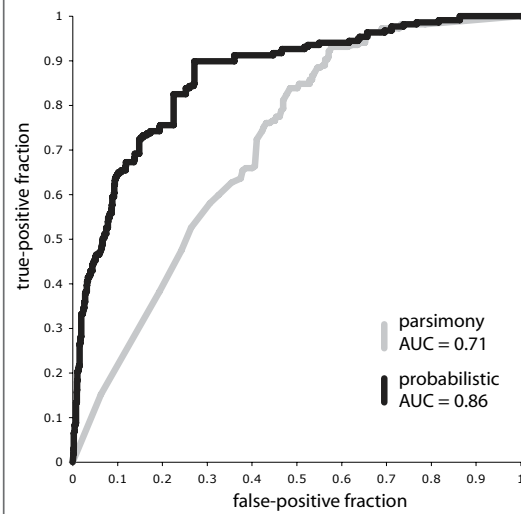

(ii) Teleost

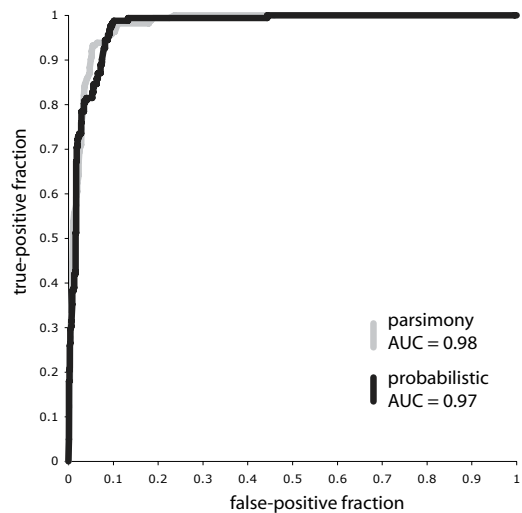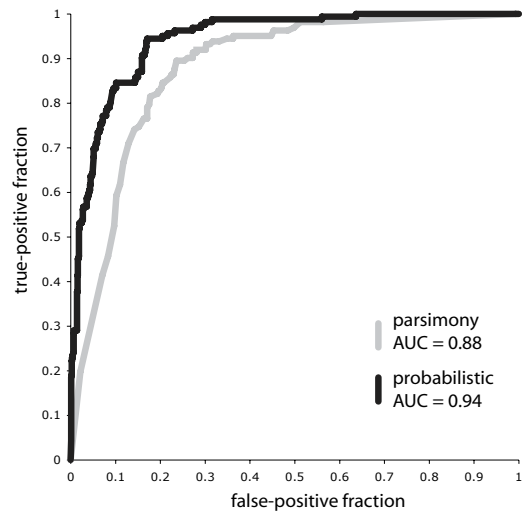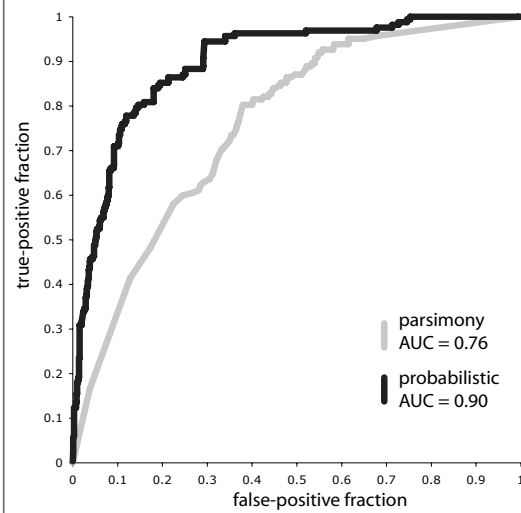

(a) no added noise

(b) adding Gaussian noise with  $\sigma = 10$

(c) adding Gaussian noise with  $\sigma = 20$
