# Supplementary material
Source: PubMed Central journal article supplement (PMC2154451)

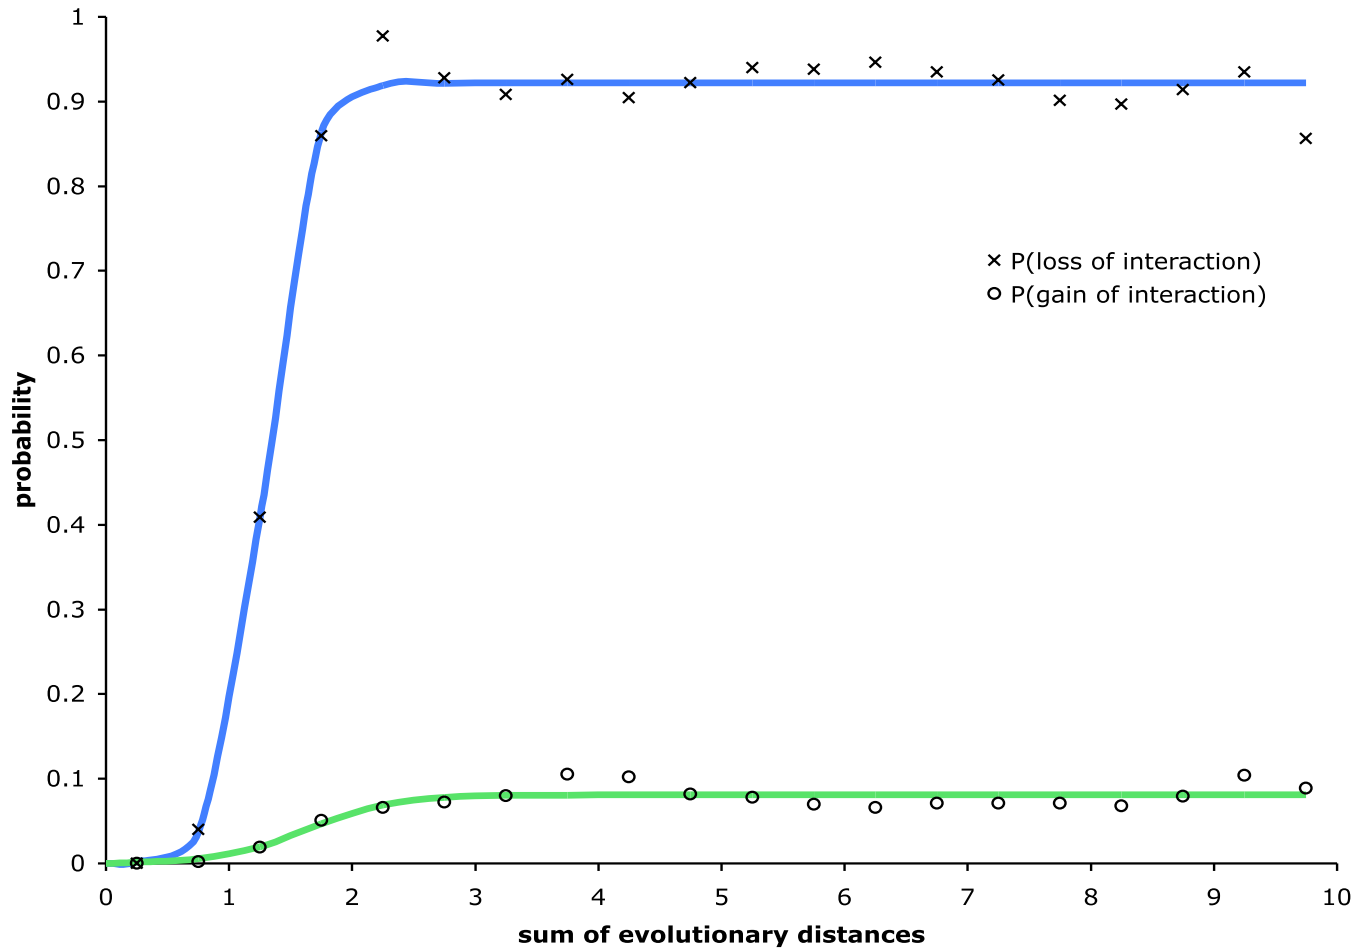

Supplement: supp_0706339104_06339Fig5.pdf [file supp_0706339104_06339Fig5.pdf]

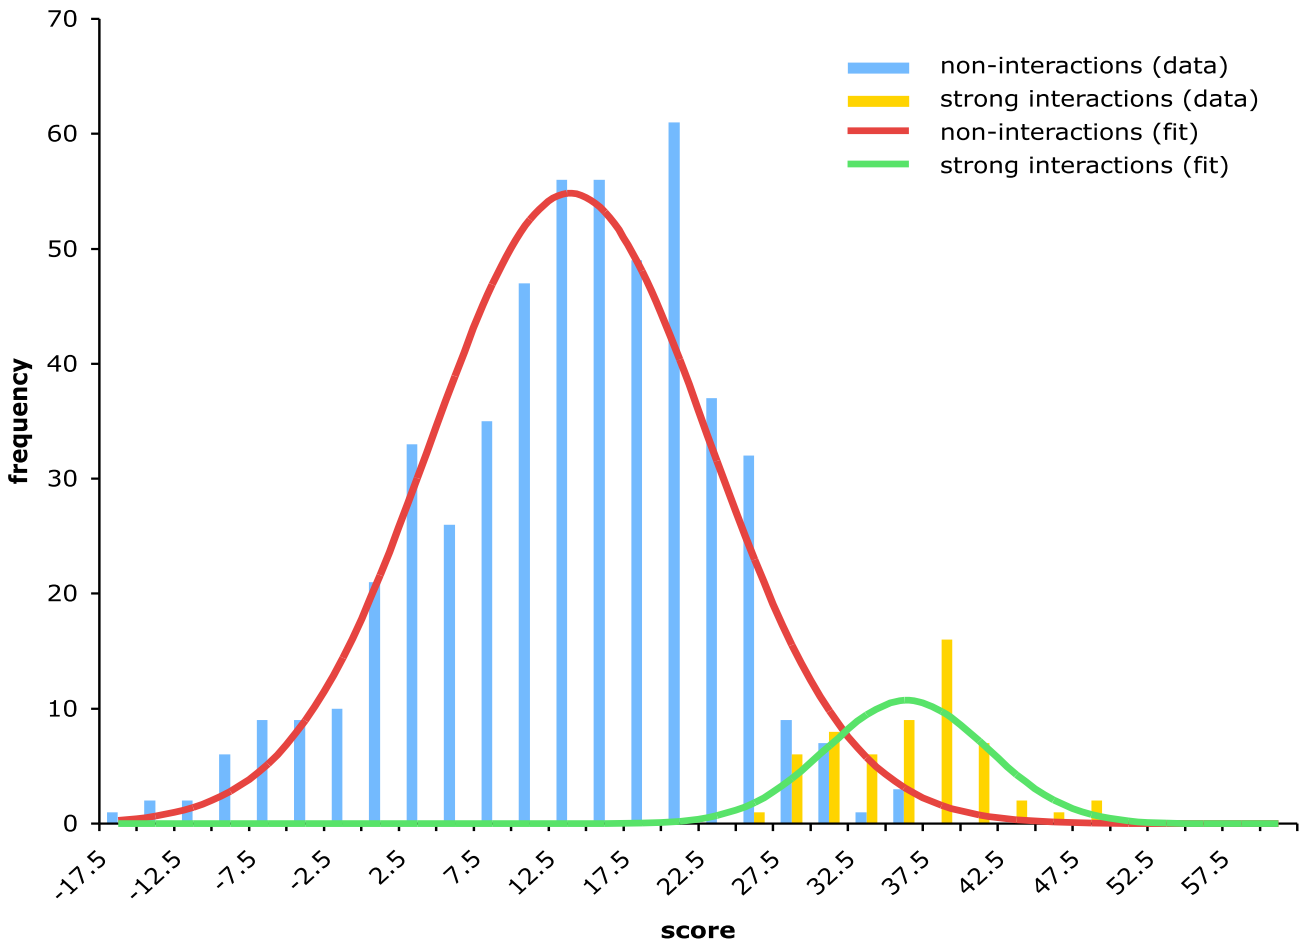

Supplement: supp_0706339104_06339Fig6.pdf [file supp_0706339104_06339Fig6.pdf]

- homodimer    ● ATF6    ● CREB    ● ATF2    ● ATF3
- no homodimer    ● E4BP4    ● BATF    ● JUN    ● FOS
- ATF4    ● CEBP    ● PAR    ● OASIS

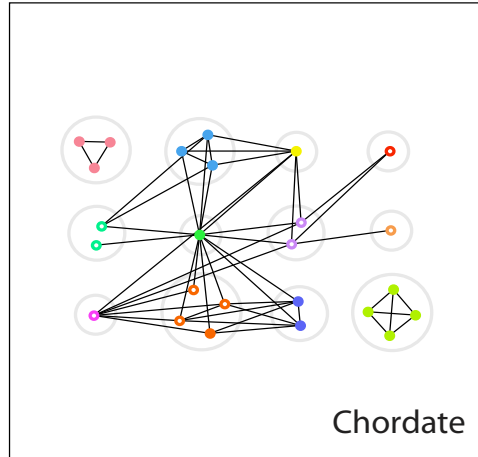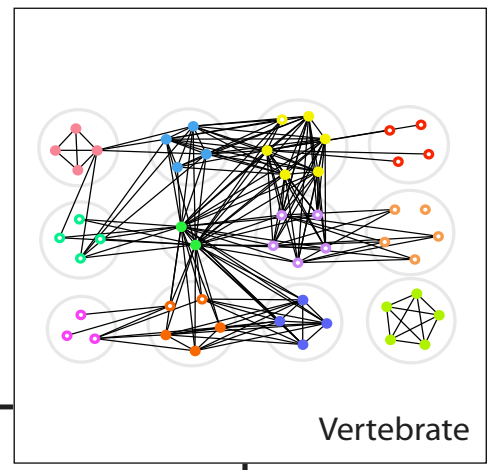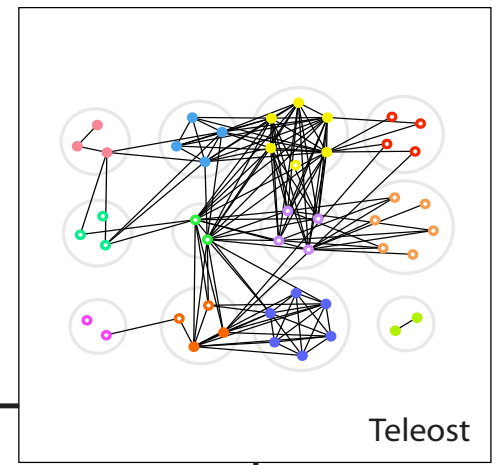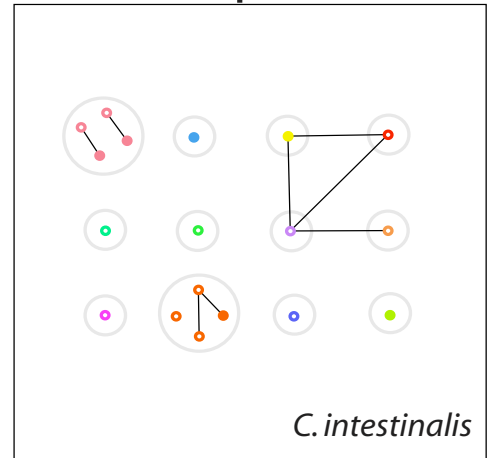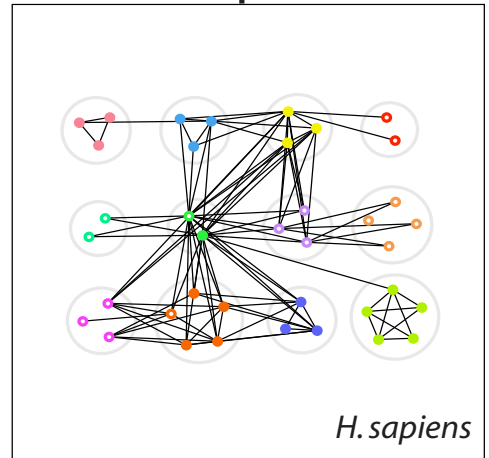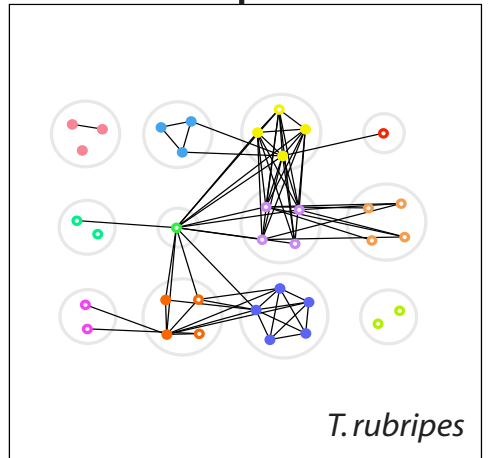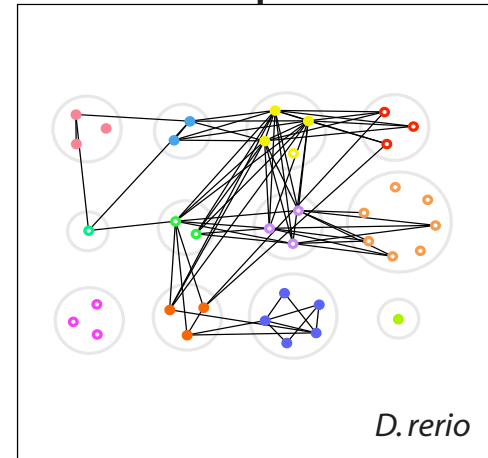

Supplement: supp_0706339104_06339Fig7.pdf [file supp_0706339104_06339Fig7.pdf]

- homodimer    ● ATF6    ● CREB    ● ATF2    ● ATF3
- no homodimer    ● E4BP4    ● BATF    ● JUN    ● FOS
- ATF4    ● CEBP    ● PAR    ● OASIS

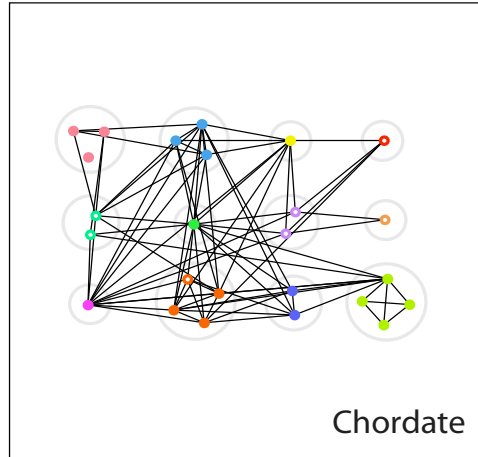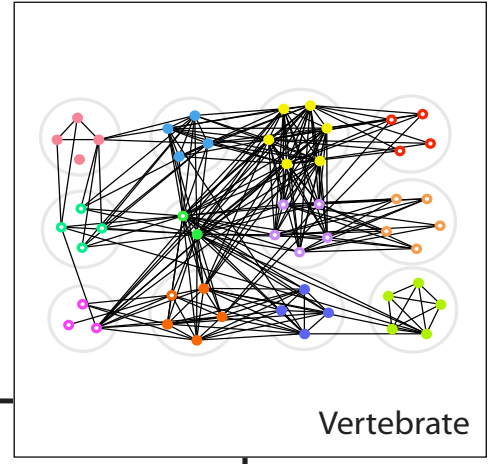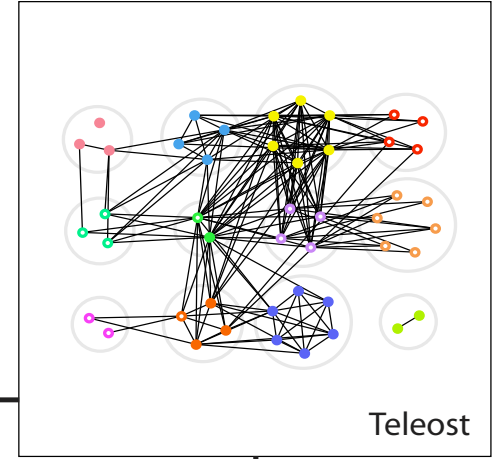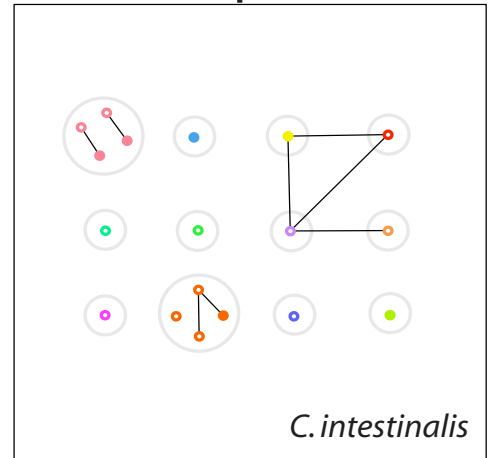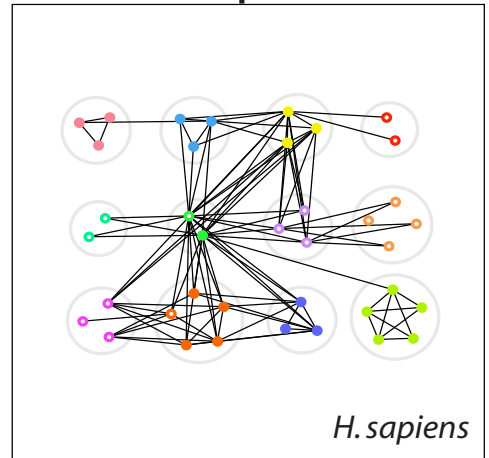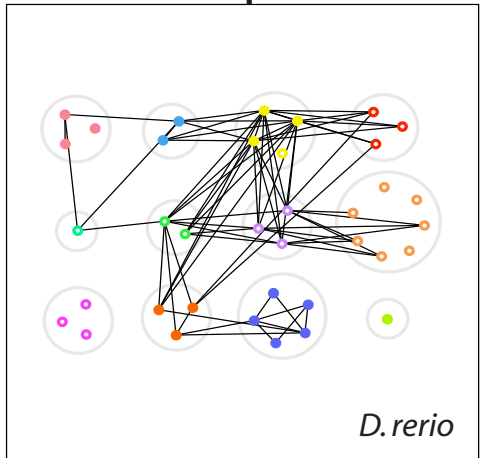

Supplement: supp_0706339104_06339Fig8.pdf [file supp_0706339104_06339Fig8.pdf]
